# Supplementary material for: An ordered pathway for the assembly of fungal ESCRT-containing ambient pH signalling complexes at the plasma membrane
Source: PubMed Central journal article supplement — J Cell Sci. 2012 Apr 1;125(7):1784–95. doi: 10.1242/jcs.098897 (PMC3346829; doi:10.1242/jcs.098897), 2012-04-01
Supplement: supp_125.7.1784_JCS098897TableS1-S2.pdf [file supp_125.7.1784_JCS098897TableS1-S2.pdf]

**Supplemental Table 1: Strains used in this work**

| <i>MAD no.</i> | <i>complete genotype</i>                                                                | <i>source</i>                     |
|----------------|-----------------------------------------------------------------------------------------|-----------------------------------|
| 2              | <i>biA1</i>                                                                             | <i>Our collection</i>             |
| 1739           | <i>pyrG89 pyroA4 nkuAΔ::bar</i>                                                         | <i>H.N.Arst</i>                   |
| 1740           | <i>pyrG89 pyroA4 nkuAΔ::bar pacC900</i>                                                 | <i>H.N.Arst</i>                   |
| 2220           | <i>pyrG89? pabaA1 palH72 palA::gfp-pyrG<sup>Af</sup> inoB2 pyroA4</i>                   | <i>This study</i>                 |
| 2221           | <i>pyrG89? palH72 palA::gfp-pyrG<sup>Af</sup> inoB2</i>                                 | <i>This study</i>                 |
| 2223           | <i>pyrG89? palA::gfp-pyrG<sup>Af</sup> pyroA4</i>                                       | <i>This study</i>                 |
| 2224           | <i>pyrG89? palA::gfp-pyrG<sup>Af</sup> inoB2 palB38</i>                                 | <i>This study</i>                 |
| 2225           | <i>pyrG89? wA1 palA::gfp-pyrG<sup>Af</sup> pyroA4 palB38</i>                            | <i>This study</i>                 |
| 2231           | <i>pyrG89? palA::gfp-pyrG<sup>Af</sup> pyroA4? palCΔ::pyroA<sup>Af</sup></i>            | <i>This study</i>                 |
| 2232           | <i>pyrG89? palA::gfp-pyrG<sup>Af</sup> pyroA4? palCΔ::pyroA<sup>Af</sup></i>            | <i>This study</i>                 |
| 2234           | <i>pyrG89? palA::gfp-pyrG<sup>Af</sup></i>                                              | <i>This study</i>                 |
| 2486           | <i>pyroA4[pyroA*-gpdA<sup>mini</sup>::PalF-(HA)3] inoB2 nkuA::bar pacC900</i>           | <i>Hervás-Aguilar et al. 2010</i> |
| 2569           | <i>pyrG89? palA::mCherry-pyrG<sup>Af</sup> palC::gfp-pyrG<sup>Af</sup> niiA4</i>        | <i>This study</i>                 |
| 2570           | <i>ya2 pabaA1 pyrG89? palA::mCherry-pyrG<sup>Af</sup> palC::gfp-pyrG<sup>Af</sup></i>   | <i>This study</i>                 |
| 2630           | <i>pyrG89? palA::gfp-pyrG<sup>Af</sup> pyroA4 sltA54 fwA1</i>                           | <i>This study</i>                 |
| 2631           | <i>biA1 pyrG89? palA::gfp-pyrG<sup>Af</sup> pyroA4 sltA54 fwA1</i>                      | <i>This study</i>                 |
| 2632           | <i>biA1 pyrG89? vps32Δ::pyrG<sup>Af</sup> palA::gfp-pyrG<sup>Af</sup> pyroA4 sltA54</i> | <i>This study</i>                 |
| 2633           | <i>pyrG89? vps32Δ::pyrG<sup>Af</sup> palA::gfp-pyrG<sup>Af</sup> pyroA4 sltA54</i>      | <i>This study</i>                 |
| 2648           | <i>biA1 pyrG89? vps32Δ::pyrG<sup>Af</sup> palC::gfp-pyrG<sup>Af</sup> sltA54</i>        | <i>This study</i>                 |
| 2649           | <i>pyrG89? vps32Δ::pyrG<sup>Af</sup> palC::gfp-pyrG<sup>Af</sup> sltA54</i>             | <i>This study</i>                 |
| 2705           | <i>palH72 nkuAΔ::bar pyroA4::[pyroA*-gpdA<sup>mini</sup>::palF::(HA)3] pacC900</i>      | <i>Hervás-Aguilar et al. 2010</i> |
| 2719           | <i>pyroA4::[pyroA*-gpdA<sup>mini</sup>::palF::(HA)3::UbK48R] pacC900</i>                | <i>Hervás-Aguilar et al. 2010</i> |
| 2900           | <i>pyrG89? nkuAΔ::bar pyroA4 vps4-1 pacC900</i>                                         | <i>This study</i>                 |
| 2965           | <i>pyrG89? pyroA4 palC::gfp-pyrG<sup>Af</sup> sltA59 vps27Δ::pyrG<sup>Af</sup></i>      | <i>This study</i>                 |
| 2966           | <i>pyrG89? palC::gfp-pyrG<sup>Af</sup> sltA59 vps27Δ::pyrG<sup>Af</sup></i>             | <i>This study</i>                 |
| 2967           | <i>pyrG89? palC::gfp-pyrG<sup>Af</sup> sltA59</i>                                       | <i>This study</i>                 |

**Supplemental Table 1 (cont.): Strains used in this work**

|      |                                                                                                                               |                |
|------|-------------------------------------------------------------------------------------------------------------------------------|----------------|
| 3007 | <i>pyroA4[pyroA*-gpdA<sup>mini</sup>::palF-(HA)3] pacC900 pantoB100[pantoB*-gpdA<sup>mini</sup>::palH-(Myc)3]</i>             | Hervás-Aguilar |
| 3052 | <i>pyrG89? pabaA1 vps4-(HA)3 pacC900?</i>                                                                                     | This study     |
| 3153 | <i>pyrG89 pyroA4 nkuA::bar vps23::gfp-pyrG<sup>Af</sup></i>                                                                   | This study     |
| 3200 | <i>pyrG89? pyroA4 palC::gfp-pyrG<sup>Af</sup> vps4-(HA)3</i>                                                                  | This study     |
| 3201 | <i>pyrG89? yA2 pabaA1 palC::gfp-pyrG<sup>Af</sup> vps4-(HA)3</i>                                                              | This study     |
| 3214 | <i>pyrG89? yA2 pabaA1 pyroA4 palC::gfp-pyrG<sup>Af</sup> sltA58 vps23Δ::pyrG<sup>Af</sup></i>                                 | This study     |
| 3216 | <i>pyrG89? yA2, pabaA1 palC::gfp-pyrG<sup>Af</sup> sltA58 vps23Δ::pyrG<sup>Af</sup></i>                                       | This study     |
| 3217 | <i>pyrG89? yA2, pabaA1 palC::gfp-pyrG<sup>Af</sup> sltA58</i>                                                                 | This study     |
| 3270 | <i>pyrG89? nkuAΔ::bar pyroA4 vps4-1 pacC900</i>                                                                               | This study     |
| 3347 | <i>pyrG89? palC::gfp-pyrG<sup>Af</sup> vps4-1 pacC900?</i>                                                                    | This study     |
| 3348 | <i>pyrG89? yA2 pyroA4 palC::gfp-pyrG<sup>Af</sup> vps4-1 pacC900?</i>                                                         | This study     |
| 3367 | <i>pyrG89? pantoB100 vps23::gfp-pyrG<sup>Af</sup></i>                                                                         | This study     |
| 3368 | <i>pyrG89? pyroA4 palF15 vps23-gfp::pyrG<sup>Af</sup></i>                                                                     | This study     |
| 3369 | <i>pyrG89? pyroA4 palF15 vps23-gfp::pyrG<sup>Af</sup></i>                                                                     | This study     |
| 3373 | <i>pyrG89? pyroA4 sltA59 vps27Δ::pyrG<sup>Af</sup> vps23::gfp-pyrG<sup>Af</sup></i>                                           | This study     |
| 3374 | <i>pyrG89? sltA59 vps27Δ::pyrG<sup>Af</sup> vps23::gfp-pyrG<sup>Af</sup></i>                                                  | This study     |
| 3375 | <i>pyrG89? pyroA4 sltA59 vps23::gfp-pyrG<sup>Af</sup></i>                                                                     | This study     |
| 3465 | <i>pyrG89? pyroA4[pyroA*-gpdA<sup>mini</sup>::palF-(HA)3] vps23::gfp-pyrG<sup>Af</sup></i>                                    | This study     |
| 3935 | <i>pyrG89 pyroA4[pyroA*-vps4<sup>p</sup>::vps4-(HA)3] nkuAΔ::bar vps4-1 pacC900</i>                                           | This study     |
| 3936 | <i>pyrG89 pyroA4[pyroA*-vps4<sup>p</sup>::vps4-(HA)3] nkuAΔ::bar pacC900</i>                                                  | This study     |
| 3973 | <i>pyrG89? wA4 palA::mCherry-pyrG<sup>Af</sup> inoB2 pyroA4 sltA59 vps27Δ::pyrG<sup>Af</sup> vps23::gfp-pyrG<sup>Af</sup></i> | This study     |

## Supplemental Table II, Oligonucleotides used in this work

|                                                                           | Oligo Sequence                                                 |
|---------------------------------------------------------------------------|----------------------------------------------------------------|
| <b>palA-Primers</b>                                                       |                                                                |
| <b>cDNA &amp; sequence analysis</b>                                       |                                                                |
| ADH7 Rev                                                                  | GAAGATCTCAGCTCCTGGAG                                           |
| ADH8 For                                                                  | CCTAAACTCTACACCACCGC                                           |
| 5' cDNAPalA-NcoI                                                          | AAACCATGGCCTCAAATATCCTCCAG                                     |
| 3' cDNAPalA-EcoRI                                                         | AAAGAATTCATGAGAACTCATCCCCTTCG                                  |
| <b>C-terminal tagging</b>                                                 |                                                                |
| palA 5' FOR                                                               | GGCCAGTCTACTATCATCGCTCAATCTCCC                                 |
| palA 3' REV                                                               | TGAGAACTTCATCCCCTTCGACGGATCCC                                  |
| palA::GFP FOR                                                             | GGGATCCGTCGAAGGGGATGAAGTTCTCAGGAGCTGGTGACGGCGCTGGAGCC          |
| pyrGum::3'UTR palA REV                                                    | CAAAGCATATGTTTAGTAGCGTATTAAGGTGTCTGAGAGGAGGCACTGATGCC          |
| 3'UTR palA FOR                                                            | ACCTTAATACGCTACTAAACATATGCTTTG                                 |
| palA 3'UTR REV                                                            | GATTCTCTACTTACCTTATATACCCTGACG                                 |
| <b>palC-Primers</b>                                                       |                                                                |
| <b>Deletion</b>                                                           |                                                                |
| PalC5UTR5'                                                                | GCGTTGCGACCGCAGCTACG                                           |
| PalC5UTR3'                                                                | GGTGACGAATGTGTAGCTTGGGTGGTTGTAG                                |
| PalC5' pyro                                                               | CTACAACCACCCAGACTACACATTCGTACCCGGACATCAGATGCTGGATTACTAAGGTAATG |
| PalC3' pyro                                                               | GGTAAGGGATACACAAGACCAAAATTTGGATAGCGAGTGTCTACATAATGAAGGACAAATG  |
| PalC3UTR5'                                                                | TATCCAAATTTGGTCTTGTGTATCCCCTTACC                               |
| PalC3UTR3'                                                                | GTTAAGCCAGCCGTATCCTC                                           |
| <b>palH-Primers</b>                                                       |                                                                |
| <b>pGEX-2T tail cloning</b>                                               |                                                                |
| 3' BamHI palH tail                                                        | AAAGGATCCCTATCGTTGAGAGTGGGACTCC                                |
| 5' BamHI palH tail                                                        | AAAGGATCCTGGGAGTGGGTGGAACGTATC                                 |
| <b>vps4- Primers</b>                                                      |                                                                |
| <b>5' utr vps4-pyrGA.f-niiA::HA<sub>3</sub>::vps4 &amp; vps4 plasmids</b> |                                                                |
| XhoI 5UTRvps4-5                                                           | AAACTCGAGCTGTTGTTGATCTGACTCTGG                                 |
| PstI 5UTRvps4-3                                                           | AAACTGCACTCTCGCTATATTTATCCAAGCGC                               |
| SpeI-niiA                                                                 | CACTAGTTGTGAGAGTATGGGATAGG                                     |
| 3-niiA                                                                    | GATGGCGGGCGCGGTGATTGAGC                                        |
| niiA-HA-fusion                                                            | GCTCAATCACCGCGCCGCCATCATGGCCGATCTTTTACCACATGATG                |
| HA-ORFvps4-fusion                                                         | CGGCCAAGGAAGTCGGTATTGCTCATCTGAGCAGCGTAATCTGGAACGTCATATG        |
| 5secniiA                                                                  | GAACTGGGAACTGTCCAGAATATG                                       |
| 3secniiA                                                                  | CATATTTCTGGACAGTCCCGATTTC                                      |
| 5-ORFvps4                                                                 | ATGAGCAATACCGACTTCCTTGG                                        |
| NotI 3-ORFvps4                                                            | GCGGCCGCACTCGTCTGGAATCTTCGGC                                   |
| 5secVps4                                                                  | GTGCGAAGGAGGCGCTGAAGG                                          |
| 3secVps4                                                                  | CCTTCAGCGCCTCCTTCGCAC                                          |
| 5' Vps4+niiA tail                                                         | CCTGTCTCAATCACCGCGCCGCCATCATGATGAGCAATACCGACTTCCTTGGC          |
| 3nii+vps4tail                                                             | GCCAAGGAAGTCGGTATTGCTCATGATGGCGGGCGGGTATTGAGCAGGG              |
| <b>vps23- Primers</b>                                                     |                                                                |
| <b>cDNA and pGEX-2T cloning</b>                                           |                                                                |
| 3' EcoRI-Vps23                                                            | GAATTCTAGTATTCTCTAGGCCCATACC                                   |
| 5' BamHI-vps23                                                            | GGATCCATGGCGTCAGTCCCACAGAGGAC                                  |
| <b>cDNA Vps23 sequence analysis</b>                                       |                                                                |
| 5' exonII                                                                 | GATCACTACGACCCCAAGCAAACATATC                                   |
| 3' exonII                                                                 | TGTAGACTGCGGTTTCAGGGGCAAG                                      |
| 5' exonIV                                                                 | CGCTCTTCCCTCTTGACCTTCTGTC                                      |
| 3' exonIV                                                                 | GAGAGCTTTGGAGACGGCCTG                                          |
| <b>pGEX-2T Vps23-UEV cloning</b>                                          |                                                                |
| 5' UEV-vps23                                                              | AAAGGATCCAGCGTTCTGATCAGGGATCACTACGAC                           |
| 3' UEV-vps23                                                              | AAAGAATTTCTGTTTGTACTTGTACGGGAGG                                |
| <b>C-terminal tagging</b>                                                 |                                                                |
| 5' Vps23                                                                  | GCTACCTCCATTACCACCGAAGG                                        |
| 3' Vps23                                                                  | GTATTCCTCTAGGCCCATACCCCTTG                                     |
| 5' Vps23tag                                                               | GGCAAGGGTATGGCCCTAGAGGAATACGGAGCTGGTGACGGCGCTGGAGCCGG          |
| 3' Vps23tag                                                               | GTCTATAGATCAATGCGAACAAAAGCACGGTCTGAGAGGAGGCACTGATGCGTG         |
| 5' Vps23-UTR                                                              | CGTGCTTTTGTTCGATTGATCTATAG                                     |
| 3' Vps23-UTR                                                              | CGCTGAGACACCAATATCAGCCAG                                       |
| <b>sItA &amp; vps32 sequencing</b>                                        |                                                                |
| 5' sItA54                                                                 | GCTGGGACCTTGCCCCCTC                                            |
| 3' sItA54                                                                 | CAGCGCAATGTAGCCAAC                                             |
| 5' UTR-Vps32                                                              | GTGAAAGACTCAAGTCGTCTACC                                        |
| 3' UTR-Vps32                                                              | CCCTGTTTCATCATATGTGTAGGG                                       |
| Fup-Vps32                                                                 | GTCTCCAAGACAGCATTGACG                                          |
| Rdown-Vps32                                                               | GTCCCAATCCTAAACATCC                                            |
